# Supplementary material for: Influence of Citrus sunki and Poncirus trifoliata Root Extracts on Metabolome of Phytophthora parasitica
Source: MDPI journal article supplement (doi:10.3390/metabo14040206), 2024-04-05
Supplement: s1 [file s1]

## Supporting information

# Influence of *Citrus sunki* and *Poncirus trifoliata* Root Extracts on Metabolome of *Phytophthora parasitica*

Héros José Maximo <sup>1,2,\*</sup>, Francisca Diana da Silva Araújo <sup>3,4</sup>, Carolina Clepf Pagotto <sup>3</sup>, Leonardo Pires Boava <sup>1,5</sup>, Ronaldo José Durigan Dalio <sup>1</sup>, Gustavo Henrique Bueno Duarte <sup>3</sup>, Marcos Nogueira Eberlin <sup>3,6</sup> and Marcos Antonio Machado <sup>1</sup>

<sup>1</sup> Biotechnology Laboratory, Centro de Citricultura Sylvio Moreira, Agronomic Institute, Cordeirópolis, SP 13490-970, Brazil; leonardo.boava@unar.edu.br (L.P.B.); rdalio@ideelab.com.br (R.J.D.D.); marcos@ccsm.br (M.A.M.)

<sup>2</sup> BioXyz Biotecnologia Microbiana e Bioprocessos e Industriais Ltda., Piracicaba, SP 13414-224, Brazil

<sup>3</sup> ThoMSon Mass Spectrometry Laboratory, Chemistry Institute, University of Campinas, UNICAMP, Campinas, SP 13083-970, Brazil; diana.araujo@ufpi.edu.br (F.D.d.S.A.); carolcpagotto@gmail.com (C.C.P.); gustavo\_duarte95@hotmail.com (G.H.B.D.); marcos.eberlin@mackenzie.br (M.N.E.)

<sup>4</sup> Campus Professora Cinobelina Elvas, Federal University of Piauí, Bom Jesus, PI 64900-000, Brazil

<sup>5</sup> Centro Universitário 'Dr. Edmundo Ulson' – UNAR, Araras, SP 13603-112, Brazil

<sup>6</sup> School of Material Engineering and Nanotechnology, MackMass Laboratory, Mackenzie Presbyterian University, São Paulo, SP 01302-907, Brazil

\* Correspondence: heros@bioxyz.com.br; Tel.: +55-19-999829900

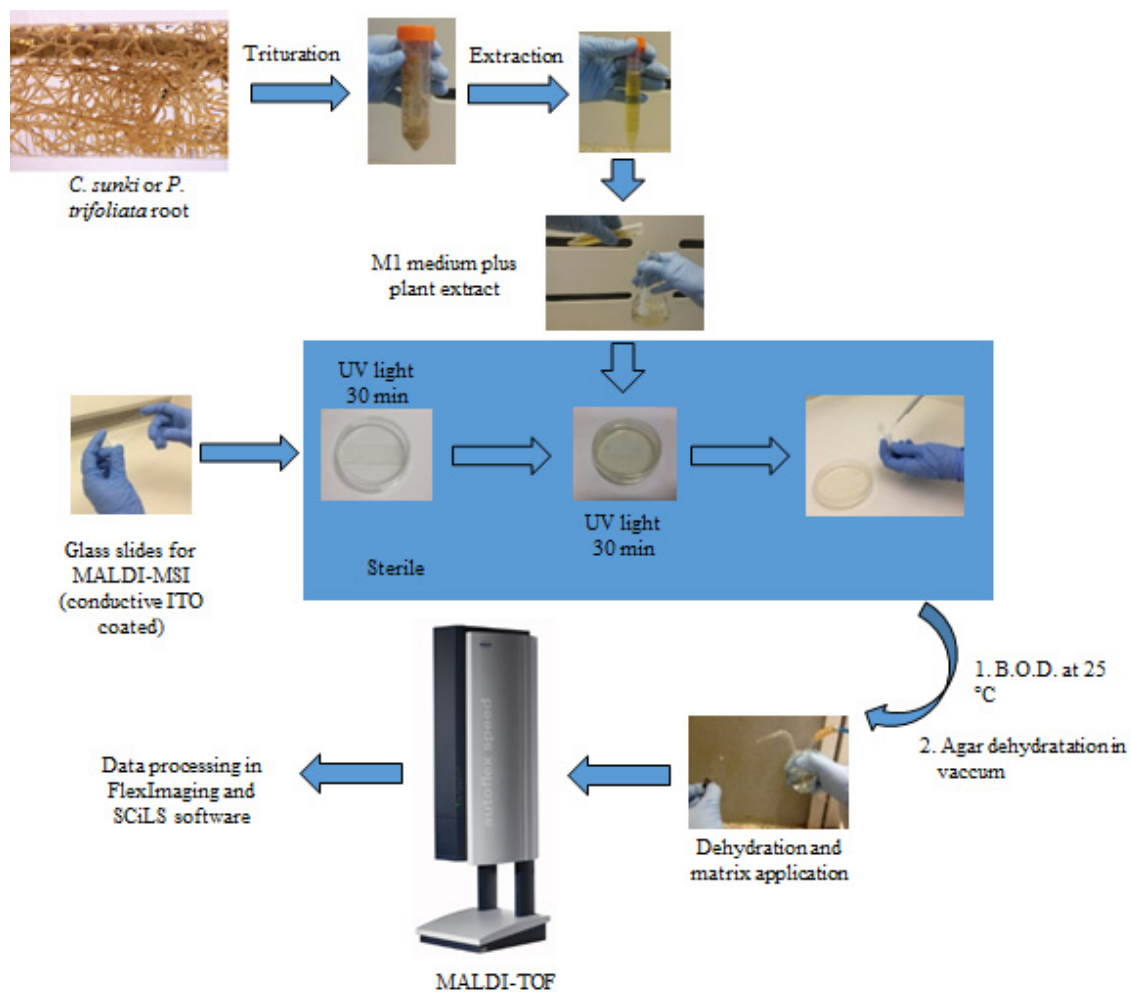

**Scheme S-1.** Steps for microbial MALDI-MSI developed in this work.

**Table S-1.** Specific metabolites of *P. parasitica* detected by MALDI-MSI.

| MALDI-MSI | ESI-FT-ICR-MS | MS/MS fragment masses                 | Type of ion          | Molecular<br>formula                                         | Putative<br>assignments | $\Delta$ (ppm) |
|-----------|---------------|---------------------------------------|----------------------|--------------------------------------------------------------|-------------------------|----------------|
| 152       | 152.0941      | -                                     | -                    | -                                                            | No match                | -              |
| 156       | 156.1210      | 156, 117, 104, 70, 60                 | -                    | -                                                            | No match                | -              |
| 200       | 200.1724      | -                                     | -                    | -                                                            | No match                | -              |
| 246       | 246.1558      | 246, 229, 212, 132, 112, 70, 60       | [M + H] <sup>+</sup> | C <sub>9</sub> H <sub>19</sub> N <sub>5</sub> O <sub>3</sub> | Arg-Ala                 | 1              |
| 258       | 258.1737      | -                                     | -                    | -                                                            | No match                | -              |
| 459       | 459.3078      | 458, 441, 315, 291, 165, 133, 89      | -                    | -                                                            | No match                | -              |
| 468       | 468.3891      | 468, 400, 373, 317, 285, 174, 114, 58 | -                    | -                                                            | No match                | -              |
| 517       | 517.3705      | -                                     | -                    | -                                                            | No match                | -              |
| 542       | 542.2656      | 541, 509, 461, 355, 300, 121          | -                    | -                                                            | No match                | -              |
| 620       | 620.6166      | -                                     | -                    | -                                                            | No match                | -              |

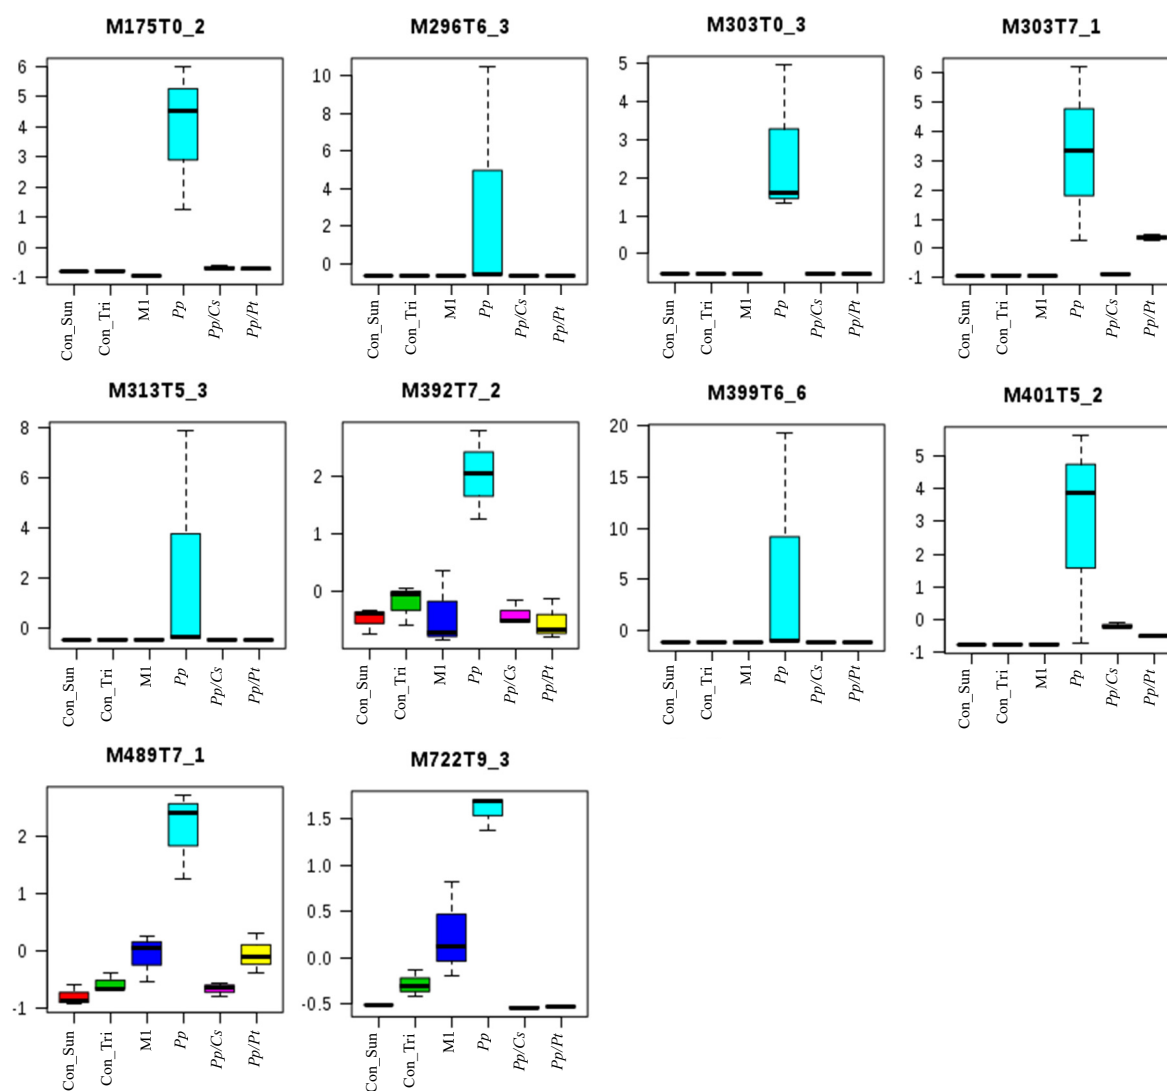

**Figure S-1.** Box plot of the signal intensity of *P. parasitica* metabolites detected by UHPLC-ESI-Q-TOF-MS and selected by PLS-DA loading plot.

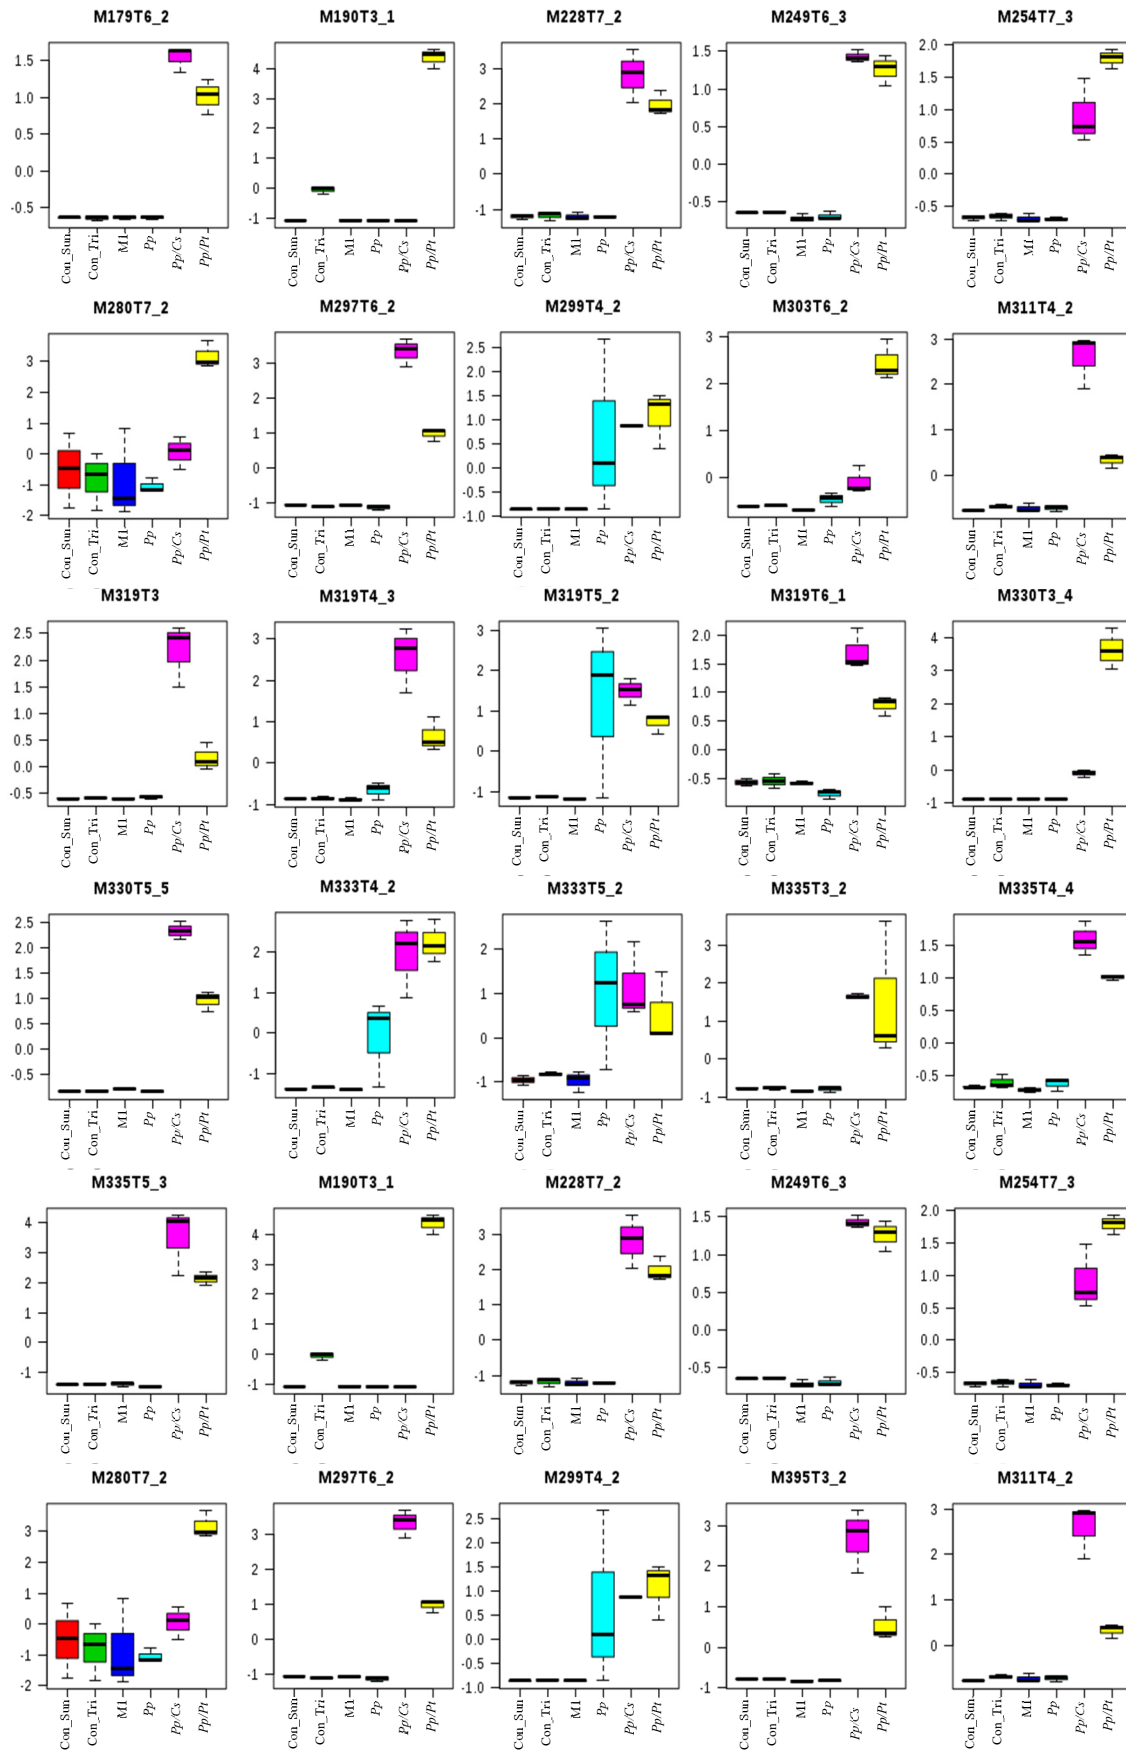

**Figure S-2.** Discriminant metabolites of *Pp/Pt* and *Pp/Cs* samples.

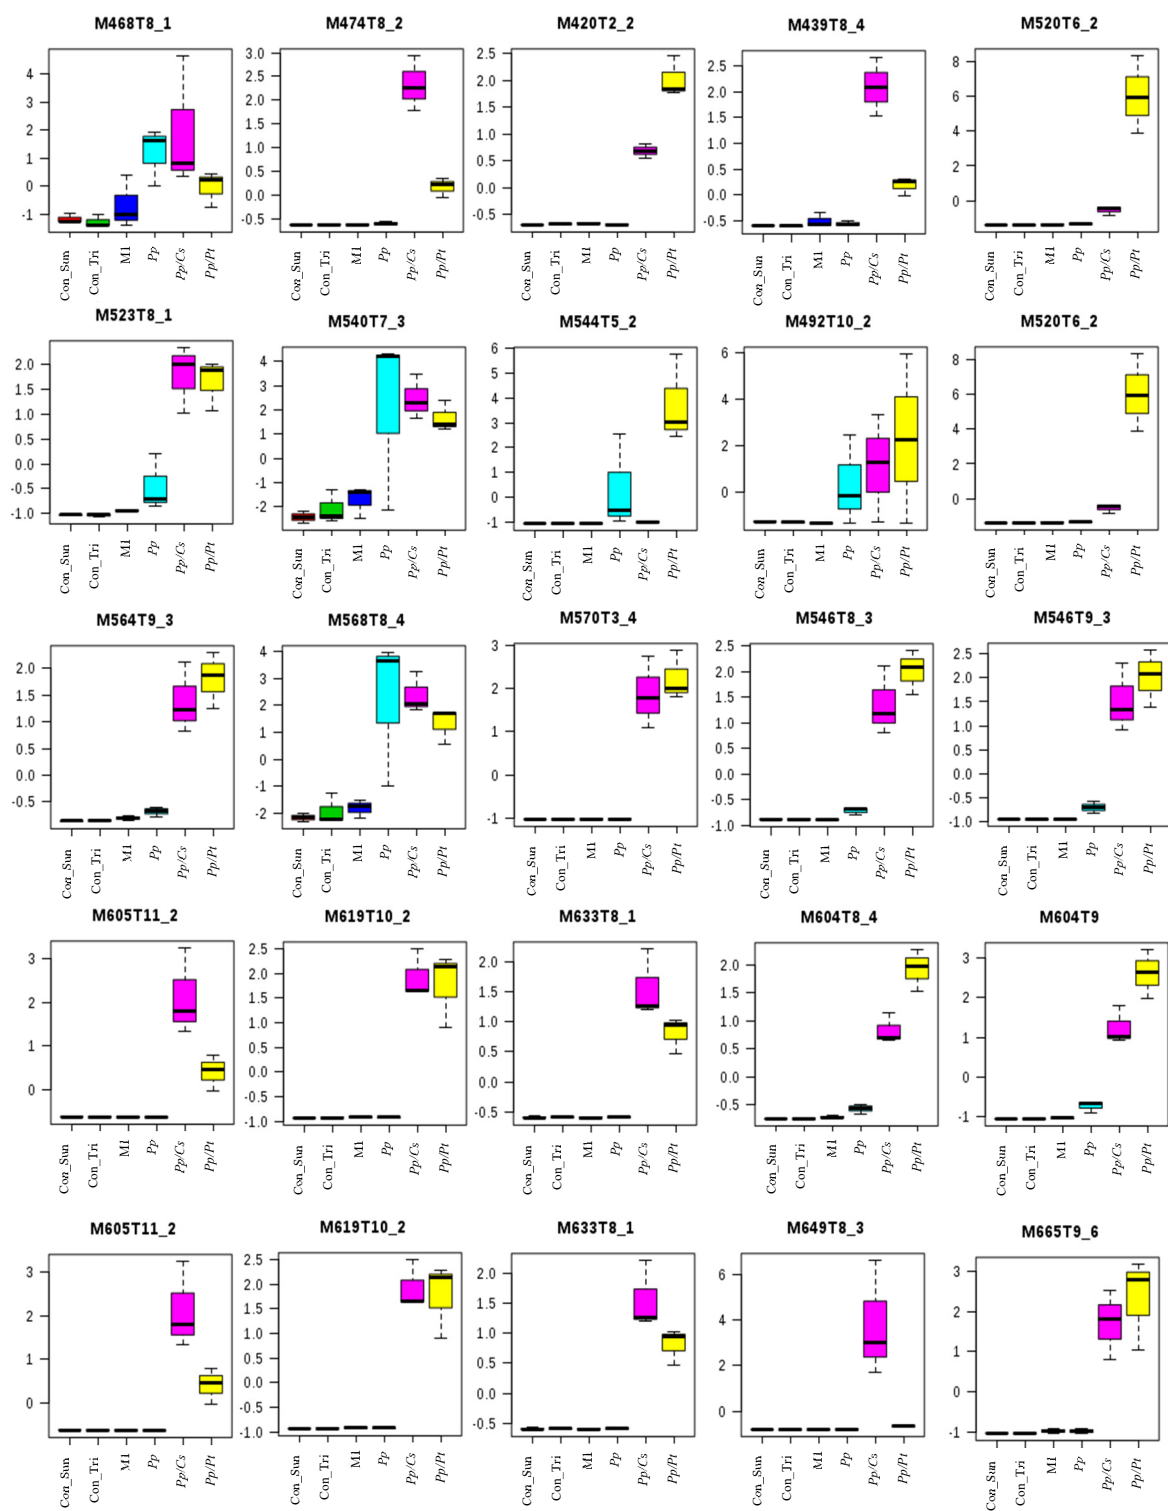

**Figure S-3.** Discriminant metabolites of *Pp/Pt* and *Pp/Cs* samples (continuation).

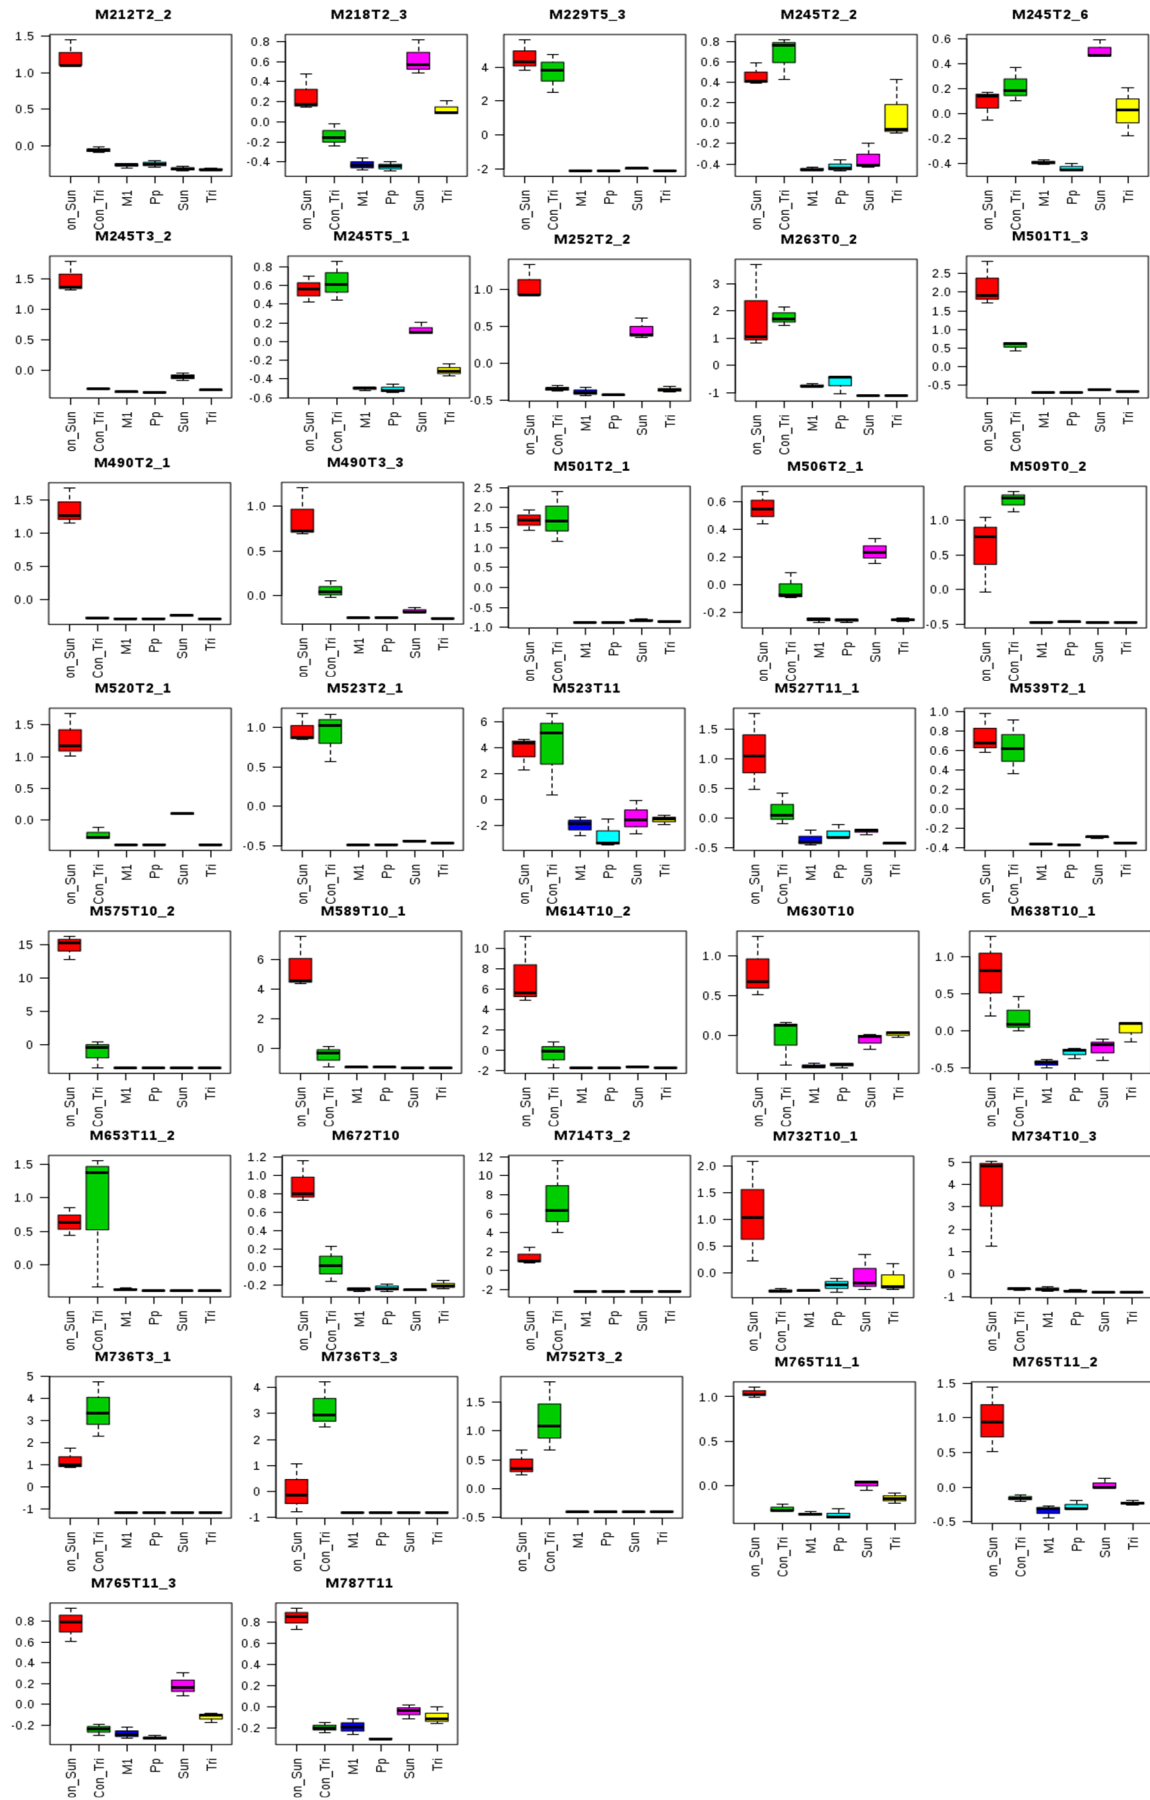

**Figure S-4.** Discriminant metabolites of Con\_*Pt* and Con\_*Cs* samples. Sun=*Pt*/*Cs*;  
Tri=*Pp*/*Pt*.
